# Supplementary material
Source: MDPI journal article supplement (https://www.mdpi.com/2076-3417/14/4/1669)
Supplement: s1 [file s1]

## Supplemental Table S1. Excluded articles

| Authors                        | Reason for exclusion                           |
|--------------------------------|------------------------------------------------|
| Bell & Epker 1976              | No periodontal outcomes were reported          |
| Glassman et al. 1984           | No periodontal outcomes were reported          |
| Kraut 1984                     | No periodontal outcomes were reported          |
| Bays & Greco 1992              | Unclear periodontal outcomes                   |
| Handelman 1997                 | Same patient sample from Handelman 1994        |
| Berger et al. 1998             | No periodontal outcomes were reported          |
| Matteini & Mommaerts 2001      | No periodontal outcomes were reported          |
| Pinto et al. 2001              | No periodontal outcomes were reported          |
| Bierenbroodspot et al. 2002    | Retrospective case series with <10 patients    |
| Neyt et al. 2002               | No periodontal outcomes were reported          |
| Garib et al. 2006              | Prospective case series with <10 patients      |
| Harzer et al. 2006             | No periodontal outcomes were reported          |
| Hansen et al. 2007             | No periodontal outcomes were reported          |
| Aziz et al. 2008               | No periodontal outcomes were reported          |
| Chamberland & Proffit 2008     | No periodontal outcomes were reported          |
| De Freitas et al. 2008         | No periodontal outcomes were reported          |
| Fernandez-Sanroman et al. 2009 | Unclear periodontal outcomes                   |
| Koudstaal et al. 2009          | No periodontal outcomes were reported          |
| Landes et al. 2009b            | Same patient sample from Landes et al. 2009a   |
| Laudemann et al. 2009          | Same patient sample from Landes et al. 2009a   |
| Angeletti et al. 2010          | No periodontal outcomes were evaluated         |
| El-Sayed & Khalil 2010         | No periodontal outcomes were evaluated         |
| Laudemann et al. 2010          | Same patient sample from Landes et al. 2009a   |
| Laudemann et al. 2011          | Same patient sample from Landes et al. 2009a   |
| Martorelli et al. 2011         | No periodontal outcomes were evaluated         |
| Seeberger et al. 2011          | Unclear periodontal outcomes                   |
| Nada et al. 2012               | No periodontal outcomes were evaluated         |
| Zambon et al. 2012             | No periodontal outcomes were evaluated         |
| Sygouros et al. 2014b          | Same patient sample from Sygouros et al. 2014a |
| Dergin et al. 2015             | No periodontal outcomes were evaluated         |
| Jensen et al. 2015             | Unclear periodontal outcomes                   |
| Salguiero et al. 2015          | No periodontal outcomes were evaluated         |
| Verquin et al. 2016            | Unclear periodontal outcomes                   |
| Jensen & Rodrigo-Domingo 2017  | No periodontal outcomes were evaluated         |
| Pereira et al. 2018            | No periodontal outcomes were evaluated         |
| Fonseca et al. 2019            | No periodontal outcomes were evaluated         |
| Andreischev et al. 2020        | No periodontal outcomes were evaluated         |

|                       |                                              |
|-----------------------|----------------------------------------------|
| Li et al. 2020        | No periodontal outcomes were evaluated       |
| Drobyshev et al. 2021 | Unclear periodontal outcomes                 |
| Gul et al. 2021       | No periodontal outcomes were evaluated       |
| Kernitsky et al. 2021 | Retrospective case series with <10 patients  |
| Landes et al. 2021    | Same patient sample from Landes et al. 2009a |
| Pereira et al. 2021   | Unclear periodontal outcomes                 |
| Noverraz et al. 2021  | Unclear periodontal outcomes                 |
| Turker et al. 2022    | No periodontal outcomes were evaluated       |

**Supplemental Table S2.** Quality assessment of non-randomized studies based on the Newcastle-Ottawa Scale (NOS)

| Cohort studies              | Selection                                |                                      |                           |                                                                                  | Comparability                                                  |                          | Outcomes                                    |                                  | Total stars |
|-----------------------------|------------------------------------------|--------------------------------------|---------------------------|----------------------------------------------------------------------------------|----------------------------------------------------------------|--------------------------|---------------------------------------------|----------------------------------|-------------|
|                             | Representativeness of the exposed cohort | Selection of the non-exposed cohorts | Ascertainment of exposure | Demonstration that outcome of interest was not present at the start of the study | Comparability of cohort on the bases of the design or analysis | Ascertainment of outcome | Follow-up long enough for outcomes to occur | Adequacy of follow-up of cohorts |             |
| Greenbaum & Zachrisson 1982 | *                                        | *                                    | *                         | /                                                                                | **                                                             | *                        | *                                           | *                                | 8           |
| Handelman 1996              | *                                        | *                                    | *                         | *                                                                                | *                                                              | *                        | *                                           | *                                | 8           |
| Northway & Meade Jr. 1997   | *                                        | *                                    | *                         | *                                                                                | *                                                              | *                        | *                                           | *                                | 8           |
| Carmen et al. 2000          | /                                        | *                                    | *                         | *                                                                                | *                                                              | /                        | *                                           | *                                | 6           |
| Handelman et al. 2000       | *                                        | *                                    | *                         | *                                                                                | **                                                             | *                        | *                                           | /                                | 8           |
| Ramieri et al. 2005         | *                                        | /                                    | *                         | *                                                                                | *                                                              | *                        | *                                           | /                                | 6           |
| Rungcharassaeng et al. 2007 | *                                        | /                                    | *                         | *                                                                                | *                                                              | *                        | *                                           | *                                | 7           |
| Landes et al. 2009          | *                                        | /                                    | *                         | *                                                                                | *                                                              | *                        | *                                           | *                                | 7           |
| Gauthier et al. 2011        | *                                        | /                                    | *                         | *                                                                                | /                                                              | /                        | *                                           | *                                | 5           |
| Verlinden et al. 2011       | *                                        | /                                    | *                         | /                                                                                | /                                                              | *                        | *                                           | *                                | 5           |
| Williams et al. 2012        | *                                        | /                                    | *                         | /                                                                                | /                                                              | *                        | *                                           | *                                | 5           |
| Kilic et al 2013            | *                                        | /                                    | *                         | *                                                                                | /                                                              | *                        | *                                           | *                                | 6           |
| Sygouros et al. 2014        | *                                        | /                                    | *                         | *                                                                                | /                                                              | *                        | *                                           | *                                | 6           |
| Lin et al. 2015             | /                                        | /                                    | *                         | *                                                                                | *                                                              | *                        | *                                           | *                                | 6           |
| Siqueira et al. 2015        | *                                        | /                                    | *                         | *                                                                                | *                                                              | *                        | *                                           | *                                | 7           |
| Kim et al. 2017             | *                                        | /                                    | *                         | *                                                                                | *                                                              | *                        | *                                           | *                                | 7           |
| Sendyk et al. 2018          | *                                        | /                                    | *                         | *                                                                                | *                                                              | *                        | *                                           | /                                | 6           |
| Moon et al. 2020            | *                                        | /                                    | *                         | *                                                                                | /                                                              | *                        | *                                           | *                                | 6           |
| Li and Guilleminault 2022   | /                                        | /                                    | *                         | /                                                                                | /                                                              | *                        | *                                           | *                                | 4           |
| Martin 2023                 | *                                        | /                                    | *                         | *                                                                                | /                                                              | *                        | *                                           | /                                | 5           |

*Note:* A study can be awarded a maximum of one star for each numbered item within the Selection and Outcome categories. A maximum of two stars can be given for Comparability. /: Study did not meet criteria, \*: Study met criteria.

**Supplemental Table S3.** Bias risk assessment for RCTs using Cochrane Risk of Bias Tool for Randomized Controlled Trials

| Author              | Randomization process | Deviation from intended intervention | Missing outcome data | Measurement of the data | Selection of the reported result | Risk |
|---------------------|-----------------------|--------------------------------------|----------------------|-------------------------|----------------------------------|------|
| Kayalar et al. 2016 | Low                   | Low                                  | Low                  | Low                     | Low                              | Low  |
